# Supplementary material for: Machine learning approach to predict acute kidney injury among patients undergoing multi-level spinal posterior instrumented fusion
Source: PubMed Central journal article supplement — J Spine Surg. 2024 Aug 23;10(3):362–71. doi: 10.21037/jss-24-15 (PMC11467292; doi:10.21037/jss-24-15), 2024-08-23
Supplement: jss-10-03-362-supplementary.pdf [file jss-10-03-362-supplementary.pdf]

**Table S1** International Classification of Diseases, Ninth (ICD-9) and Tenth (ICD-10) Edition Codes Used to Identify Comorbidities

| Comorbidity                                                                     | Code(s)                                                                                                                                                                                                                                                                                                                                                                                                                                                                                                                                                                                                                                                                                                                                                                                                                                                                                                                                                                                                                                                                                                                                                                                                                                                                                                                                                                                                                                                                                                                                                                                                                                                                                                                                                                                                                                                                                                                                                                                                                                                                                 |
|---------------------------------------------------------------------------------|-----------------------------------------------------------------------------------------------------------------------------------------------------------------------------------------------------------------------------------------------------------------------------------------------------------------------------------------------------------------------------------------------------------------------------------------------------------------------------------------------------------------------------------------------------------------------------------------------------------------------------------------------------------------------------------------------------------------------------------------------------------------------------------------------------------------------------------------------------------------------------------------------------------------------------------------------------------------------------------------------------------------------------------------------------------------------------------------------------------------------------------------------------------------------------------------------------------------------------------------------------------------------------------------------------------------------------------------------------------------------------------------------------------------------------------------------------------------------------------------------------------------------------------------------------------------------------------------------------------------------------------------------------------------------------------------------------------------------------------------------------------------------------------------------------------------------------------------------------------------------------------------------------------------------------------------------------------------------------------------------------------------------------------------------------------------------------------------|
| Obesity                                                                         | ICD-9-D-27800, ICD-9-D-27801, ICD-9-D-27802, ICD-9-D-27803, ICD-9-D-V8530, ICD-9-D-V8531, ICD-9-D-V8532, ICD-9-D-V8533, ICD-9-D-V8534, ICD-9-D-V8535, ICD-9-D-V8536, ICD-9-D-V8537, ICD-9-D-V8538, ICD-9-D-V8539, ICD-9-D-V8541, ICD-9-D-V8542, ICD-9-D-V8543, ICD-9-D-V8544, ICD-9-D-V8545, ICD-10-D-E66, ICD-10-D-Z683, ICD-10-D-Z684                                                                                                                                                                                                                                                                                                                                                                                                                                                                                                                                                                                                                                                                                                                                                                                                                                                                                                                                                                                                                                                                                                                                                                                                                                                                                                                                                                                                                                                                                                                                                                                                                                                                                                                                                 |
| Smoking                                                                         | ICD-9-D-V1582, ICD-9-D-3051, ICD-10-D-F17                                                                                                                                                                                                                                                                                                                                                                                                                                                                                                                                                                                                                                                                                                                                                                                                                                                                                                                                                                                                                                                                                                                                                                                                                                                                                                                                                                                                                                                                                                                                                                                                                                                                                                                                                                                                                                                                                                                                                                                                                                               |
| Congestive Heart Failure                                                        | ICD-9-D-39891, ICD-9-D-40201, ICD-9-D-40211, ICD-9-D-40291, ICD-9-D-40401, ICD-9-D-40403, ICD-9-D-40411, ICD-9-D-40413, ICD-9-D-40491, ICD-9-D-4254, ICD-9-D-4255, ICD-9-D-4258, ICD-9-D-4259, ICD-9-D-4280, ICD-9-D-4281, ICD-9-D-42820, ICD-9-D-42821, ICD-9-D-42822, ICD-9-D-42823, ICD-9-D-42830, ICD-9-D-42831, ICD-9-D-42832, ICD-9-D-42833, ICD-9-D-42840, ICD-9-D-42841, ICD-9-D-42842, ICD-9-D-42843, ICD-9-D-4289, ICD-10-D-I0981, ICD-10-D-I110, ICD-10-D-I130, ICD-10-D-I132, ICD-10-D-I42, ICD-10-D-I43, ICD-10-D-I50,                                                                                                                                                                                                                                                                                                                                                                                                                                                                                                                                                                                                                                                                                                                                                                                                                                                                                                                                                                                                                                                                                                                                                                                                                                                                                                                                                                                                                                                                                                                                                     |
| Coronary Artery Disease                                                         | ICD-9-D-41000, ICD-9-D-41001, ICD-9-D-41002, ICD-9-D-41010, ICD-9-D-41011, ICD-9-D-41012, ICD-9-D-41020, ICD-9-D-41021, ICD-9-D-41022, ICD-9-D-41030, ICD-9-D-41031, ICD-9-D-41032, ICD-9-D-41040, ICD-9-D-41041, ICD-9-D-41042, ICD-9-D-41050, ICD-9-D-41051, ICD-9-D-41052, ICD-9-D-41060, ICD-9-D-41061, ICD-9-D-41062, ICD-9-D-41070, ICD-9-D-41071, ICD-9-D-41072, ICD-9-D-41080, ICD-9-D-41081, ICD-9-D-41082, ICD-9-D-41090, ICD-9-D-41091, ICD-9-D-41092, ICD-9-D-4110, ICD-9-D-4111, ICD-9-D-41181, ICD-9-D-41189, ICD-9-D-412, ICD-9-D-4130, ICD-9-D-4131, ICD-9-D-4139, ICD-9-D-41400, ICD-9-D-41401, ICD-9-D-41402, ICD-9-D-41403, ICD-9-D-41404, ICD-9-D-41405, ICD-9-D-41406, ICD-9-D-41407, ICD-9-D-41410, ICD-9-D-41411, ICD-9-D-41412, ICD-9-D-41419, ICD-9-D-4142, ICD-9-D-4143, ICD-9-D-4144, ICD-9-D-4148, ICD-9-D-4149, ICD-10-D-I20, ICD-10-D-I21, ICD-10-D-I22, ICD-10-D-I23, ICD-10-D-I24, ICD-10-D-I25                                                                                                                                                                                                                                                                                                                                                                                                                                                                                                                                                                                                                                                                                                                                                                                                                                                                                                                                                                                                                                                                                                                                                         |
| Hypertension                                                                    | ICD-9-D-4010, ICD-9-D-4011, ICD-9-D-4019, ICD-9-D-40200, ICD-9-D-40201, ICD-9-D-40210, ICD-9-D-40211, ICD-9-D-40290, ICD-9-D-40291, ICD-9-D-40300, ICD-9-D-40301, ICD-9-D-40310, ICD-9-D-40311, ICD-9-D-40390, ICD-9-D-40391, ICD-9-D-40400, ICD-9-D-40401, ICD-9-D-40402, ICD-9-D-40403, ICD-9-D-40410, ICD-9-D-40411, ICD-9-D-40412, ICD-9-D-40413, ICD-9-D-40490, ICD-9-D-40491, ICD-9-D-40492, ICD-9-D-40493, ICD-9-D-40501, ICD-9-D-40509, ICD-9-D-40511, ICD-9-D-40519, ICD-9-D-40591, ICD-9-D-40599, ICD-10-D-I10, ICD-10-D-I11, ICD-10-D-I12, ICD-10-D-I13, ICD-10-D-I15, ICD-10-D-I16                                                                                                                                                                                                                                                                                                                                                                                                                                                                                                                                                                                                                                                                                                                                                                                                                                                                                                                                                                                                                                                                                                                                                                                                                                                                                                                                                                                                                                                                                          |
| Hyperlipidemia                                                                  | ICD-9-D-2720, ICD-9-D-2721, ICD-9-D-2722, ICD-9-D-2723, ICD-9-D-2724, ICD-9-D-2725, ICD-9-D-2726, ICD-9-D-2727, ICD-9-D-2728, ICD-9-D-2729, ICD-9-D-2777, ICD-10-D-E78, ICD-10-D-E8881                                                                                                                                                                                                                                                                                                                                                                                                                                                                                                                                                                                                                                                                                                                                                                                                                                                                                                                                                                                                                                                                                                                                                                                                                                                                                                                                                                                                                                                                                                                                                                                                                                                                                                                                                                                                                                                                                                  |
| Alcohol Use Disorder                                                            | ICD-9-D-2911, ICD-9-D-2912, ICD-9-D-2913, ICD-9-D-2914, ICD-9-D-2915, ICD-9-D-29181, ICD-9-D-29182, ICD-9-D-29189, ICD-9-D-2919, ICD-9-D-30300, ICD-9-D-30301, ICD-9-D-30302, ICD-9-D-30303, ICD-9-D-30390, ICD-9-D-30391, ICD-9-D-30392, ICD-9-D-30393, ICD-9-D-30500, ICD-9-D-30501, ICD-9-D-30502, ICD-9-D-30503, ICD-9-D-3575, ICD-9-D-4255, ICD-9-D-53530, ICD-9-D-53531, ICD-9-D-5710, ICD-9-D-5711, ICD-9-D-5712, ICD-9-D-5713, ICD-9-D-9800, ICD-9-D-V113, ICD-10-D-F10, ICD-10-D-G621, ICD-10-D-I426, ICD-10-D-K292, ICD-10-D-K70, ICD-10-D-T510.                                                                                                                                                                                                                                                                                                                                                                                                                                                                                                                                                                                                                                                                                                                                                                                                                                                                                                                                                                                                                                                                                                                                                                                                                                                                                                                                                                                                                                                                                                                              |
| Depression                                                                      | ICD-9-D-3004, ICD-9-D-30112, ICD-9-D-3090, ICD-9-D-3091, ICD-9-D-311, ICD-9-D-29620, ICD-9-D-29621, ICD-9-D-29622, ICD-9-D-29623, ICD-9-D-29625, ICD-9-D-29626, ICD-9-D-29631, ICD-9-D-29632, ICD-9-D-29633, ICD-9-D-29634, ICD-9-D-29635, ICD-9-D-29636, ICD-9-D-29630, ICD-9-D-29682, ICD-9-D-81219, ICD-9-D-73311, ICD-10-D-F32, ICD-10-D-F33, ICD-10-D-F341, ICD-10-D-F4321.                                                                                                                                                                                                                                                                                                                                                                                                                                                                                                                                                                                                                                                                                                                                                                                                                                                                                                                                                                                                                                                                                                                                                                                                                                                                                                                                                                                                                                                                                                                                                                                                                                                                                                        |
| Anxiety                                                                         | ICD-10-D-F411, ICD-10-D-F413, ICD-10-D-F418, ICD-10-D-F419, ICD-10-D-F4322, ICD-9-D-30924, ICD-9-D-30928, ICD-9-D-29384, ICD-9-D-30002, ICD-9-D-30009                                                                                                                                                                                                                                                                                                                                                                                                                                                                                                                                                                                                                                                                                                                                                                                                                                                                                                                                                                                                                                                                                                                                                                                                                                                                                                                                                                                                                                                                                                                                                                                                                                                                                                                                                                                                                                                                                                                                   |
| Chronic Hypercoagulable State                                                   | ICD-9-D-28981, ICD-9-D-28982, ICD-9-D-28653, ICD-9-D-79579, ICD-9-D-V1251, ICD-9-D-V1252, ICD-9-D-V1255, ICD-10-D-Z8671, ICD-10-D-Z86711, ICD-10-D-Z86718, ICD-10-D-D6851, ICD-10-D-D6852, ICD-10-D-D6859, ICD-10-D-D6861, ICD-10-D-D6862                                                                                                                                                                                                                                                                                                                                                                                                                                                                                                                                                                                                                                                                                                                                                                                                                                                                                                                                                                                                                                                                                                                                                                                                                                                                                                                                                                                                                                                                                                                                                                                                                                                                                                                                                                                                                                               |
| Rheumatic Disease                                                               | ICD-9-D-7140, ICD-9-D-7141, ICD-9-D-7142, ICD-9-D-71430, ICD-9-D-71431, ICD-9-D-71432, ICD-9-D-71433, ICD-9-D-7144, ICD-9-D-71481, ICD-9-D-71489, ICD-9-D-7149, ICD-9-D-446, ICD-9-D-7010, ICD-9-D-7100, ICD-9-D-7101, ICD-9-D-7102, ICD-9-D-7103, ICD-9-D-7104, ICD-9-D-7108, ICD-9-D-7109, ICD-9-D-7112, ICD-9-D-714, ICD-9-D-7193, ICD-9-D-720, ICD-9-D-725, ICD-9-D-7285, ICD-9-D-72889, ICD-9-D-72930, ICD-10-D-L940, ICD-10-D-L941, ICD-10-D-L943, ICD-10-D-M05, ICD-10-D-M06, ICD-10-D-M08, ICD-10-D-M120, ICD-10-D-M123, ICD-10-D-M30, ICD-10-D-M310, ICD-10-D-M311, ICD-10-D-M312, ICD-10-D-M313, ICD-10-D-M32, ICD-10-D-M33, ICD-10-D-M34, ICD-10-D-M35, ICD-10-D-M45, ICD-10-D-M461, ICD-10-D-M468 ICD-10-D-M469                                                                                                                                                                                                                                                                                                                                                                                                                                                                                                                                                                                                                                                                                                                                                                                                                                                                                                                                                                                                                                                                                                                                                                                                                                                                                                                                                             |
| Chronic Renal Disease                                                           | ICD-9-D-40300, ICD-9-D-40301, ICD-9-D-40310, ICD-9-D-40311, ICD-9-D-40390, ICD-9-D-40391, ICD-9-D-40400, ICD-9-D-40401, ICD-9-D-40402, ICD-9-D-40403, ICD-9-D-40410, ICD-9-D-40411, ICD-9-D-40412, ICD-9-D-40413, ICD-9-D-40490, ICD-9-D-40491, ICD-9-D-40492, ICD-9-D-40493, ICD-9-D-5851, ICD-9-D-5852, ICD-9-D-5853, ICD-9-D-5854, ICD-9-D-5855, ICD-9-D-5856, ICD-9-D-5859, ICD-9-D-582, ICD-9-D-583, ICD-9-D-585, ICD-9-D-588, ICD-9-D-586, ICD-9-D-587, ICD-9-D-5880, ICD-9-D-V420, ICD-9-D-V4511, ICD-9-D-V4512, ICD-9-D-V560, ICD-9-D-V561, ICD-9-D-V562, ICD-9-D-V5631, ICD-9-D-V5632, ICD-9-D-V568, ICD-10-D-I120, ICD-10-D-I131, ICD-10-D-N032, ICD-10-D-N033, ICD-10-D-N034, ICD-10-D-N035, ICD-10-D-N036, ICD-10-D-N037, ICD-10-D-N052, ICD-10-D-N053, ICD-10-D-N054, ICD-10-D-N055, ICD-10-D-N056, ICD-10-D-N057, ICD-10-D-N18, ICD-10-D-N19, ICD-10-D-N250, ICD-10-D-Z490, ICD-10-D-Z491, ICD-10-D-Z492, ICD-10-D-Z940, ICD-10-D-Z992, ICD-10-D-I120, ICD-10-D-I131, ICD-10-D-N032, ICD-10-D-N033, ICD-10-D-N034, ICD-10-D-N035, ICD-10-D-N036, ICD-10-D-N037, ICD-10-D-N052, ICD-10-D-N053, ICD-10-D-N054, ICD-10-D-N056, ICD-10-D-N057, ICD-10-D-N18, ICD-10-D-N19, ICD-10-D-N250                                                                                                                                                                                                                                                                                                                                                                                                                                                                                                                                                                                                                                                                                                                                                                                                                                                                                      |
| Chronic Lung Disease                                                            | ICD-9-D-4910, ICD-9-D-4918, ICD-9-D-4919, ICD-9-D-4928, ICD-9-D-49120, ICD-9-D-49310, ICD-9-D-49390, ICD-9-D-4940, ICD-9-D-4168, ICD-9-D-4169, ICD-9-D-490, ICD-9-D-491, ICD-9-D-492, ICD-9-D-493, ICD-9-D-494, ICD-9-D-495, ICD-9-D-496, ICD-9-D-500, ICD-9-D-501, ICD-9-D-502, ICD-9-D-503, ICD-9-D-504, ICD-9-D-505, ICD-9-D-5064, ICD-9-D-5081, ICD-9-D-5088, ICD-10-D-J41, ICD-10-D-J411, ICD-10-D-J418, ICD-10-D-J42, ICD-10-D-J43, ICD-10-D-J430, ICD-10-D-J431, ICD-10-D-J432, ICD-10-D-J438, ICD-10-D-J439, ICD-10-D-J44, ICD-10-D-J449, ICD-10-D-J45, ICD-10-D-J4520, ICD-10-D-J4530, ICD-10-D-J4540, ICD-10-D-J4550, ICD-10-D-J45909, ICD-10-D-J45998, ICD-10-D-J479, ICD-10-D-I278, ICD-10-D-I279, ICD-10-D-I279, ICD-10-D-J40, ICD-10-D-J46, ICD-10-D-J47, ICD-10-D-J60, ICD-10-D-J61, ICD-10-D-J62, ICD-10-D-J63, ICD-10-D-J64, ICD-10-D-J65, ICD-10-D-J66, ICD-10-D-J67, ICD-10-D-J684, ICD-10-D-J701, ICD-10-D-J703                                                                                                                                                                                                                                                                                                                                                                                                                                                                                                                                                                                                                                                                                                                                                                                                                                                                                                                                                                                                                                                                                                                                                     |
| Peripheral Vascular Disease                                                     | ICD-9-D-44020, ICD-9-D-44029, ICD-9-D-4409, ICD-9-D-44389, ICD-9-D-4439, ICD-10-D-I70201, ICD-10-D-I70202, ICD-10-D-I70203, ICD-10-D-I70208, ICD-10-D-I70209, ICD-10-D-I70291, ICD-10-D-I70292, ICD-10-D-I70293, ICD-10-D-I70298, ICD-10-D-I70299, ICD-10-D-I7090, ICD-10-D-I7091, ICD-10-D-I7389, ICD-10-D-I739                                                                                                                                                                                                                                                                                                                                                                                                                                                                                                                                                                                                                                                                                                                                                                                                                                                                                                                                                                                                                                                                                                                                                                                                                                                                                                                                                                                                                                                                                                                                                                                                                                                                                                                                                                        |
| Cerebrovascular Disease                                                         | ICD-9-D-43491, ICD-9-D-43411, ICD-9-D-36234, ICD-9-D-430, ICD-9-D-431, ICD-9-D-432, ICD-9-D-433, ICD-9-D-434, ICD-9-D-435, ICD-9-D-436, ICD-9-D-437, ICD-9-D-438, ICD-10-D-V1254, ICD-10-D-I639, ICD-10-D-G45, ICD-10-D-G46, ICD-10-D-H340, ICD-10-D-I60, ICD-10-D-I61, ICD-10-D-I62, ICD-10-D-I63, ICD-10-D-I64, ICD-10-D-I65, ICD-10-D-I66, ICD-10-D-I67, ICD-10-D-I68, ICD-10-D-I69, ICD-10-D-G45, ICD-10-D-G46, ICD-10-D-H340                                                                                                                                                                                                                                                                                                                                                                                                                                                                                                                                                                                                                                                                                                                                                                                                                                                                                                                                                                                                                                                                                                                                                                                                                                                                                                                                                                                                                                                                                                                                                                                                                                                       |
| Myocardial Infarction                                                           | ICD-9-D-410, ICD-9-D-412, ICD-9-D-4148, ICD-10-D-I219, ICD-10-D-I252, ICD-10-D-I21, ICD-10-D-I22                                                                                                                                                                                                                                                                                                                                                                                                                                                                                                                                                                                                                                                                                                                                                                                                                                                                                                                                                                                                                                                                                                                                                                                                                                                                                                                                                                                                                                                                                                                                                                                                                                                                                                                                                                                                                                                                                                                                                                                        |
| Peptic Ulcer Disease                                                            | ICD-9-D-521, ICD-9-D-532, ICD-9-D-533, ICD-9-D-534, ICD-10-D-K25, ICD-10-D-K26, ICD-10-D-K27, ICD-10-D-K28                                                                                                                                                                                                                                                                                                                                                                                                                                                                                                                                                                                                                                                                                                                                                                                                                                                                                                                                                                                                                                                                                                                                                                                                                                                                                                                                                                                                                                                                                                                                                                                                                                                                                                                                                                                                                                                                                                                                                                              |
| Dementia                                                                        | ICD-9-D-290, ICD-9-D-2941, ICD-9-D-3312, ICD-9-D-797, ICD-10-D-F00, ICD-10-D-F01, ICD-10-D-F02, ICD-10-D-F03, ICD-10-D-F051, ICD-10-D-G30, ICD-10-D-G310, ICD-10-D-G311                                                                                                                                                                                                                                                                                                                                                                                                                                                                                                                                                                                                                                                                                                                                                                                                                                                                                                                                                                                                                                                                                                                                                                                                                                                                                                                                                                                                                                                                                                                                                                                                                                                                                                                                                                                                                                                                                                                 |
| Hemiplegia                                                                      | ICD-9-D-3341, ICD-9-D-342, ICD-9-D-343, ICD-9-D-3440, ICD-9-D-3441, ICD-9-D-3442, ICD-9-D-3443, ICD-9-D-3444, ICD-9-D-3445, ICD-9-D-3446, ICD-9-D-3449, ICD-10-D-G041, ICD-10-D-G114, ICD-10-D-G801, ICD-10-D-G802, ICD-10-D-G81, ICD-10-D-G82, ICD-10-D-G830, ICD-10-D-G831, ICD-10-D-G832, ICD-10-D-G833, ICD-10-D-G834, ICD-10-D-G839                                                                                                                                                                                                                                                                                                                                                                                                                                                                                                                                                                                                                                                                                                                                                                                                                                                                                                                                                                                                                                                                                                                                                                                                                                                                                                                                                                                                                                                                                                                                                                                                                                                                                                                                                |
| Diabetes without Complications                                                  | ICD-9-D-2500, ICD-9-D-2501, ICD-9-D-2502, ICD-9-D-2503, ICD-9-D-2508, ICD-9-D-2509, ICD-10-D-E100, ICD-10-D-E101, ICD-10-D-E106, ICD-10-D-E108, ICD-10-D-E109, ICD-10-D-E110, ICD-10-D-E111, ICD-10-D-E116, ICD-10-D-E118, ICD-10-D-E119, ICD-10-D-E120, ICD-10-D-E121, ICD-10-D-E126, ICD-10-D-E128, ICD-10-D-E129, ICD-10-D-E130, ICD-10-D-E131, ICD-10-D-E136, ICD-10-D-E138, ICD-10-D-E139, ICD-10-D-E140, ICD-10-D-E141, ICD-10-D-E146, ICD-10-D-E148, ICD-10-D-E149                                                                                                                                                                                                                                                                                                                                                                                                                                                                                                                                                                                                                                                                                                                                                                                                                                                                                                                                                                                                                                                                                                                                                                                                                                                                                                                                                                                                                                                                                                                                                                                                               |
| Diabetes with Complications                                                     | ICD-9-D-2504, ICD-9-D-2505, ICD-9-D-2506, ICD-9-D-2507, ICD-10-D-E102, ICD-10-D-E103, ICD-10-D-E104, ICD-10-D-E105, ICD-10-D-E107, ICD-10-D-E112, ICD-10-D-E113, ICD-10-D-E114, ICD-10-D-E115, ICD-10-D-E117, ICD-10-D-E122, ICD-10-D-E123, ICD-10-D-E124, ICD-10-D-E125, ICD-10-D-E127, ICD-10-D-E132, ICD-10-D-E133, ICD-10-D-E134, ICD-10-D-E135, ICD-10-D-E137, ICD-10-D-E142, ICD-10-D-E143, ICD-10-D-E144, ICD-10-D-E145, ICD-10-D-E147                                                                                                                                                                                                                                                                                                                                                                                                                                                                                                                                                                                                                                                                                                                                                                                                                                                                                                                                                                                                                                                                                                                                                                                                                                                                                                                                                                                                                                                                                                                                                                                                                                           |
| Mild Liver Disease                                                              | ICD-9-D-7022, ICD-9-D-7023, ICD-9-D-7032, ICD-9-D-7033, ICD-9-D-7044, ICD-9-D-7054, ICD-9-D-706, ICD-9-D-709, ICD-9-D-570, ICD-9-D-571, ICD-9-D-5733, ICD-9-D-5734, ICD-9-D-5738, ICD-9-D-5739, ICD-10-D-V427, ICD-10-D-B18, ICD-10-D-K700, ICD-10-D-K701, ICD-10-D-K702, ICD-10-D-K703, ICD-10-D-K709, ICD-10-D-K713, ICD-10-D-K714, ICD-10-D-K715, ICD-10-D-K717, ICD-10-D-K73, ICD-10-D-K74, ICD-10-D-K760, ICD-10-D-K762, ICD-10-D-K763, ICD-10-D-K764, ICD-10-D-K768, ICD-10-D-K769, ICD-10-D-Z944                                                                                                                                                                                                                                                                                                                                                                                                                                                                                                                                                                                                                                                                                                                                                                                                                                                                                                                                                                                                                                                                                                                                                                                                                                                                                                                                                                                                                                                                                                                                                                                 |
| Moderate/Severe Liver Disease                                                   | ICD-9-D-4560, ICD-9-D-4561, ICD-9-D-4562, ICD-9-D-5722, ICD-9-D-5723, ICD-9-D-5724, ICD-9-D-5725, ICD-9-D-5726, ICD-9-D-5727, ICD-9-D-5728, ICD-10-D-I850, ICD-10-D-I859, ICD-10-D-I864, ICD-10-D-I982, ICD-10-D-K704, ICD-10-D-K711, ICD-10-D-K721, ICD-10-D-K729, ICD-10-D-K765, ICD-10-D-K766, ICD-10-D-K767                                                                                                                                                                                                                                                                                                                                                                                                                                                                                                                                                                                                                                                                                                                                                                                                                                                                                                                                                                                                                                                                                                                                                                                                                                                                                                                                                                                                                                                                                                                                                                                                                                                                                                                                                                         |
| Atrial Fibrillation                                                             | ICD-9-D-42731, ICD-10-D-I4891                                                                                                                                                                                                                                                                                                                                                                                                                                                                                                                                                                                                                                                                                                                                                                                                                                                                                                                                                                                                                                                                                                                                                                                                                                                                                                                                                                                                                                                                                                                                                                                                                                                                                                                                                                                                                                                                                                                                                                                                                                                           |
| Solid Malignancy                                                                | ICD-9-D-140, ICD-9-D-1958, ICD-9-D-200, ICD-9-D-201, ICD-9-D-202, ICD-9-D-203, ICD-9-D-204, ICD-9-D-205, ICD-9-D-206, ICD-9-D-207, ICD-9-D-208, ICD-9-D-2386, ICD-9-D-141, ICD-9-D-142, ICD-9-D-143, ICD-9-D-144, ICD-9-D-145, ICD-9-D-146, ICD-9-D-147, ICD-9-D-148, ICD-9-D-149, ICD-9-D-150, ICD-9-D-151, ICD-9-D-152, ICD-9-D-153, ICD-9-D-154, ICD-9-D-155, ICD-9-D-156, ICD-9-D-157, ICD-9-D-158, ICD-9-D-159, ICD-9-D-160, ICD-9-D-161, ICD-9-D-162, ICD-9-D-163, ICD-9-D-164, ICD-9-D-165, ICD-9-D-166, ICD-9-D-167, ICD-9-D-168, ICD-9-D-169, ICD-9-D-170, ICD-9-D-171, ICD-9-D-172, ICD-9-D-174, ICD-9-D-175, ICD-9-D-176, ICD-9-D-177, ICD-9-D-178, ICD-9-D-179, ICD-9-D-180, ICD-9-D-181, ICD-9-D-182, ICD-9-D-183, ICD-9-D-184, ICD-9-D-185, ICD-9-D-186, ICD-9-D-187, ICD-9-D-188, ICD-9-D-189, ICD-9-D-190, ICD-9-D-191, ICD-9-D-192, ICD-9-D-193, ICD-9-D-194, ICD-10-D-C00, ICD-10-D-C01, ICD-10-D-C02, ICD-10-D-C03, ICD-10-D-C04, ICD-10-D-C05, ICD-10-D-C06, ICD-10-D-C07, ICD-10-D-C08, ICD-10-D-C26, ICD-10-D-C30, ICD-10-D-C31, ICD-10-D-C32, ICD-10-D-C33, ICD-10-D-C34, ICD-10-D-C37, ICD-10-D-C38, ICD-10-D-C39, ICD-10-D-C40, ICD-10-D-C41, ICD-10-D-C43, ICD-10-D-C45, ICD-10-D-C46, ICD-10-D-C47, ICD-10-D-C48, ICD-10-D-C49, ICD-10-D-C50, ICD-10-D-C51, ICD-10-D-C52, ICD-10-D-C53, ICD-10-D-C54, ICD-10-D-C55, ICD-10-D-C56, ICD-10-D-C57, ICD-10-D-C58, ICD-10-D-C60, ICD-10-D-C61, ICD-10-D-C62, ICD-10-D-C63, ICD-10-D-C64, ICD-10-D-C65, ICD-10-D-C66, ICD-10-D-C67, ICD-10-D-C68, ICD-10-D-C69, ICD-10-D-C70, ICD-10-D-C71, ICD-10-D-C72, ICD-10-D-C73, ICD-10-D-C74, ICD-10-D-C75, ICD-10-D-C76, ICD-10-D-C81, ICD-10-D-C82, ICD-10-D-C83, ICD-10-D-C84, ICD-10-D-C85, ICD-10-D-C88, ICD-10-D-C90, ICD-10-D-C91, ICD-10-D-C92, ICD-10-D-C93, ICD-10-D-C94, ICD-10-D-C95, ICD-10-D-C96, ICD-10-D-C97, ICD-10-D-C09, ICD-10-D-C10, ICD-10-D-C11, ICD-10-D-C12, ICD-10-D-C13, ICD-10-D-C14, ICD-10-D-C15, ICD-10-D-C16, ICD-10-D-C17, ICD-10-D-C18, ICD-10-D-C19, ICD-10-D-C20, ICD-10-D-C21, ICD-10-D-C22, ICD-10-D-C23, ICD-10-D-C24, ICD-10-D-C25 |
| Metastatic Cancer                                                               | ICD-9-D-196, ICD-9-D-197, ICD-9-D-198, ICD-9-D-199, ICD-10-D-C77, ICD-10-D-C78, ICD-10-D-C79, ICD-10-D-C80                                                                                                                                                                                                                                                                                                                                                                                                                                                                                                                                                                                                                                                                                                                                                                                                                                                                                                                                                                                                                                                                                                                                                                                                                                                                                                                                                                                                                                                                                                                                                                                                                                                                                                                                                                                                                                                                                                                                                                              |
| Human Immunodeficiency Virus (HIV) or Acquired Immunodeficiency Syndrome (AIDS) | ICD-9-D-042, ICD-9-D-043, ICD-9-D-044, ICD-10-B20, ICD-10-B21, ICD-10-B22, ICD-10-B24                                                                                                                                                                                                                                                                                                                                                                                                                                                                                                                                                                                                                                                                                                                                                                                                                                                                                                                                                                                                                                                                                                                                                                                                                                                                                                                                                                                                                                                                                                                                                                                                                                                                                                                                                                                                                                                                                                                                                                                                   |
| Iron Deficiency Anemia                                                          | ICD-9-D-2809, ICD-10-D-D50, ICD-10-D-D500, ICD-10-D-D508, ICD-10-D-D509                                                                                                                                                                                                                                                                                                                                                                                                                                                                                                                                                                                                                                                                                                                                                                                                                                                                                                                                                                                                                                                                                                                                                                                                                                                                                                                                                                                                                                                                                                                                                                                                                                                                                                                                                                                                                                                                                                                                                                                                                 |
| Osteoporosis                                                                    | ICD-9-D-73300, ICD-9-D-73301, ICD-9-D-73302, ICD-9-D-73309, ICD-10-D-M810, ICD-10-D-M818                                                                                                                                                                                                                                                                                                                                                                                                                                                                                                                                                                                                                                                                                                                                                                                                                                                                                                                                                                                                                                                                                                                                                                                                                                                                                                                                                                                                                                                                                                                                                                                                                                                                                                                                                                                                                                                                                                                                                                                                |
| Valvular Heart Disease                                                          | ICD-9-D-0932, ICD-9-D-394, ICD-9-D-395, ICD-9-D-396, ICD-9-D-397, ICD-9-D-424, ICD-9-D-7463, ICD-9-D-7464, ICD-9-D-7465, ICD-9-D-7466, ICD-10-D-A520, ICD-10-D-I05, ICD-10-D-I06, ICD-10-D-I07, ICD-10-D-I08, ICD-10-D-I091, ICD-10-D-I098, ICD-10-D-I34, ICD-10-D-I35, ICD-10-D-I36, ICD-10-D-I37, ICD-10-D-I38, ICD-10-D-I39, ICD-10-D-Q230, ICD-10-D-Q231, ICD-10-D-Q233, ICD-10-D-Z952, ICD-10-D-Z953, ICD-10-D-Z954, ICD-9-D-V422, ICD-9-D-V433                                                                                                                                                                                                                                                                                                                                                                                                                                                                                                                                                                                                                                                                                                                                                                                                                                                                                                                                                                                                                                                                                                                                                                                                                                                                                                                                                                                                                                                                                                                                                                                                                                    |
| History of Deep Vein Thrombosis or Pulmonary Embolism                           | ICD-9-D-V1251, ICD-9-D-V1252, ICD-9-D-V1255, ICD-10-D-Z8671, ICD-10-D-Z86711, ICD-10-D-Z86718, ICD-10-D-Z8672                                                                                                                                                                                                                                                                                                                                                                                                                                                                                                                                                                                                                                                                                                                                                                                                                                                                                                                                                                                                                                                                                                                                                                                                                                                                                                                                                                                                                                                                                                                                                                                                                                                                                                                                                                                                                                                                                                                                                                           |

**Table S2** International Classification of Diseases, Ninth (ICD-9) and Tenth (ICD-10) Edition Codes Used to Identify Complications

| Complication        | Code(s)                                                                                                                                                                    |
|---------------------|----------------------------------------------------------------------------------------------------------------------------------------------------------------------------|
| Acute Kidney Injury | ICD-9-D-584, ICD-9-D-5845, ICD-9-D-5846, ICD-9-D-5847, ICD-9-D-5848, ICD-9-D-5849, ICD-10-D-N17, ICD-10-D-N170, ICD-10-D-N171, ICD-10-D-N172, ICD-10-D-N178, ICD-10-D-N179 |
